1 **Ancient Migrations - The first complete genome assembly, annotation and variants of the**  
2 **Zoroastrian-Parsi community of India**

3

4 **Authors Names and Affiliations:**

5 Naseer Pasha<sup>1&2†</sup>, Kashyap Krishnasamy<sup>1&2†</sup>, Naveenkumar Nagarajan<sup>1&2†</sup>, Seshank Mutya<sup>1&2</sup>,  
6 Bhavika Mam<sup>1&2</sup>, Kouser Sonnekhan<sup>1&2</sup>, Chellappa Gopalakrishnan<sup>1&2</sup>, Renuka Jain<sup>1&2</sup>, Viloo  
7 Morawala-Patell<sup>1,2,3\*</sup>

8

9 *<sup>1</sup>Avesthagen Limited, Bangalore, India*

10 *<sup>2</sup>The Avestagenome Project<sup>®</sup> International Pvt Ltd, Bangalore, India*

11 *<sup>3</sup>AGENOME LLC, USA*

12

13 *\*Corresponding Author:*

14 Dr.Viloo Morawala-Patell,

15 Avesthagen Limited, THE dry lab,

16 Yolee Grande, 2<sup>nd</sup> Floor, Pottery Road, Richard's Town,

17 Bangalore, Karnataka,

18 India - 560005

19 Email: [viloo@avesthagen.com](mailto:viloo@avesthagen.com)

20

21 <sup>†</sup>contributed equally

22 **Keywords:** WGS, Assembly, de novo, Zoroastrian-Parsi, endogamous, longevity, variants,  
23 pharmacogenomics

24

## 25 **Abstract**

26 With the advent of Next Generation Sequencing, many population specific whole genome  
27 sequences published thus far, predominantly represent individuals of European ancestry. While  
28 sequencing efforts of underrepresented communities in genomes datasets, like the Yoruba West-  
29 African, Han Chinese, Tibetan, South Korean, Egyptian and Japanese have recently added to the  
30 public genomic repositories, a comprehensive understanding of human genomic diversity and  
31 discovery of trait-associated variants necessitates the need for additional population specific  
32 analysis. In this context, the genomics of the population from the Indian sub-continent, given its  
33 genetic heterogeneity needs further elucidation.

34 In this context, the endogamous Zoroastrian-Parsi community of India, offer an exceptional insight  
35 into a homogenous population that has culturally, socially, and genetically remained intact, for 13  
36 centuries amidst the genomic, social and cultural Indian landscape, consequent to their migration  
37 from the ancient Persian plateau.

38 Notwithstanding longevity as a trait, this endangered community is highly susceptible to cancers,  
39 rare genetic disorders, and display a documented high incidence of neurodegenerative and  
40 autoimmune conditions. The community as a matter of cultural practice abstains from smoking.

41 Here, we describe the assembly and annotation of the genome of an adult female, Zoroastrian-  
42 Parsi individual sequenced at a high depth of 173X using a combination of short Illumina reads  
43 (160X) and long nanopore reads (13X). Using a combination of hybrid assemblers, we created a  
44 new, population-specific human reference genome, The Zoroastrian-Parsi Genome Reference  
45 Female, AGENOME-ZPGRF, contains 2,778,216,114 nucleotides as compared to 3,096,649,726  
46 in GRCh38 constituting 93.235% of the total genomic fraction. Annotation identified 20833  
47 genomic features, of which 14996 are almost identical to their counterparts on GRCh38 while  
48 5837 genomic features were covered in partial. AGENOME-ZPGRF contained 5,426,310 variants  
49 of which the majority were SNP's (4,291,601) and 960,867 SNPs were AGENOME-ZPGRF  
50 specific personal variants not listed in dbSNP.

51 We present, AGENOME-ZPGRF as a whole reference for any genetic studies involving  
52 Zoroastrian-Parsi individuals extending their application to identify disease relevant prognostic  
53 biomarkers and variants in global population genomics studies.

## 54 **Introduction**

55 Recent technological advances in high-throughput genome sequencing have brought a steep  
56 decline in the cost of genetic information<sup>1</sup>, while increasing the predictive power and path to  
57 clinical translation of risk estimates for common variants found in genome wide association  
58 studies<sup>2</sup>. Most massively parallel sequencing approaches use simple alignment of short reads to a  
59 reference genome to study genomic variation. While the approach has been successful<sup>3</sup>, an  
60 exhaustive study of structural variants and SNPs at a high depth, coverage, and confidence is  
61 essential for translation to precision medicine. The increase in long read sequencing technologies,  
62 as part of the 3<sup>rd</sup> generation genomic approaches have facilitated the assembly of large eukaryotic  
63 genomes in the last decade<sup>4,5</sup>. These advanced genomic platforms have given us powerful methods  
64 to generate long reads that compliment short accurate reads like those from Illumina sequencing  
65 chemistry to complete gaps and get better contiguity for the overall human genome.

66

67 Medical genetics has taken a leap forward in personalized medicine with the information of whole  
68 genome sequence for inheritable conditions, birth defects and chromosomal disorders<sup>6</sup>.  
69 Personalized genome assembly has shed light on the effects that non-genetic, disease-linked  
70 etiologies like methylation of CpG base pair islands have on gene availability for transcription<sup>7,8</sup>.  
71 With the advances in genomic sequencing, the importance of understanding genetic variability  
72 across extant human genomic diversity has become crucial<sup>9</sup>, especially since the current reference  
73 genome assembly GRCh38<sup>10</sup> and variants cover only a sub-section of global population sub-types  
74 due to its mosaic nature of Caucasian and African genomic admixtures. Therefore, approaches  
75 focusing on understanding the minor, ethnic population groups, hitherto unrepresented in major  
76 genome variation studies, such as HapMap<sup>11</sup>, 1000 Genome Initiative<sup>12</sup>, Human Genome Diversity  
77 Project<sup>13</sup> and disease specific variation studies like TCGA<sup>14</sup> has become a prerogative in  
78 population genomics. This approach has been extended to sequence whole genome population  
79 references from Chinese<sup>15</sup>, Ashkenazi<sup>16</sup>, Korean<sup>17</sup>, Japanese<sup>18</sup>, Turkish<sup>19</sup>, Egyptian<sup>20</sup>, South Indian  
80 Asian-Indian<sup>21,22</sup> and many more draft genomes in the recent years. The availability of reference  
81 genomes from multiple human populations greatly aids attempts to find genetic causes of traits  
82 that are over- or under-represented in those populations, including susceptibility to disease.

83

84 The Indian subcontinent is a hotspot of social, ethnic and genetic diversity with waves of migration  
85 to Southeast Asia through India<sup>23</sup>. The genetic landscape of this region is mainly constituted from  
86 Austro-Asiatic (AA), Indo-European (IE), Tibeto-Burman (TB), and Dravidian (DR) families with  
87 cultural and social frameworks that discourage and at times prohibit intermarriages between ethnic  
88 groups<sup>24,25</sup>. The extensive genetic diversity of India with genetically isolated subpopulations,  
89 makes it an ideal for population genomic studies to explore the disease–variants relationships.

90

91 The Zoroastrian-Parsi of India represent one such endogamous, genetically homogenous  
92 community. While the community members have a longer median life span, their present numbers  
93 in India are dwindling making a genomic study of the community critical for population genomics.  
94 This community in India trace their origins to migrations from the Persian plateau (~847 AD),  
95 from Pars and Khorasan through the island of Hormuz to India where they settled as Parsis and  
96 practiced their faith, Zoroastrianism. The venerate Fire as the medium of worship and practice  
97 ostracism against smokers, therefore representing an important genomic biobank in understanding  
98 diseases associated with nicotine dependence. The community has a high prevalence of  
99 cardiovascular disorders, Autoimmune disorders like Rheumatoid Arthritis,  
100 Neurological/Neurodegenerative conditions like Parkinson’s Disease, Alzheimers Disease and  
101 different types of cancers.

102

103 Here, we describe the assembly and annotation of the genome of an adult female, Zoroastrian-  
104 Parsi individual sequenced at a high depth of 173X using a combination of short Illumina reads  
105 (160X) and long nanopore reads (13X). Using a combination of hybrid assemblers, we created a  
106 new, population-specific human reference genome. The Zoroastrian-Parsi reference genome,  
107 AGENOME-ZPGRF, contains 2,778,216,114 nucleotides as compared to 3,096,649,726 in  
108 GRCh38. Annotation identified 20674 genomic features, of which 15235 are > 99% identical to  
109 their counterparts on GRCh38, while the remaining genes were found to covered in partial.  
110 AGENOME-ZPGRF contained 5,426,310 variants of which the majority were SNPs (4,291,601)  
111 and 960,867 SNPs were AGENOME-ZPGRF specific not listed in dbSNP.

112

113

114

## 115 **Materials and Methods**

116

### 117 **Sample collection and ethics statement**

118 The donor is a healthy, non-smoking Parsi female volunteer (age: 65 y.o), invited to attend blood  
119 collection camps at the Zoroastrian center in the city of Bangalore, India under the auspices of The  
120 Avestagenome Project<sup>®</sup>. The adult female (>18 years) underwent height and weight measurements  
121 and answered an extensive questionnaire designed to capture her medical, dietary, and life history.  
122 The subject provided written informed consent for the collection of samples and subsequent  
123 analysis. All health-related data collected from the cohort questionnaire were secured in The  
124 Avestagenome Project<sup>®</sup> database to ensure data privacy.

125

### 126 **Genomic DNA extraction**

127 Genomic DNA from the buffy coat of peripheral blood was extracted using the Qiagen Whole  
128 Blood and Tissue Genomic DNA Extraction kit (cat. #69504). Extracted DNA samples were  
129 assessed for quality using the Agilent Tape Station and quantified using the Qubit<sup>™</sup> dsDNA BR  
130 Assay kit (cat. #Q32850) with the Qubit 2.0<sup>®</sup> fluorometer (Life Technologies<sup>™</sup>). Purified DNA  
131 was subjected to both long-read (Nanopore GridION-X5 sequencer, Oxford Nanopore  
132 Technologies, Oxford, UK) and short-read (Illumina Technologies)

133

### 134 **Library preparation and sequencing on the Nanopore platform**

135 Libraries of long reads from genomic DNA were generated using standard protocols from Oxford  
136 Nanopore Technology (ONT) using the SQK-LSK109 ligation sequencing kit. Briefly, 1.5 µg of  
137 high-molecular-weight genomic DNA was subjected to end repair using the NEBNext Ultra II End  
138 Repair kit (NEB, cat. #E7445) and purified using 1x AmPure beads (Beckman Coulter Life  
139 Sciences, cat. #A63880). Sequencing adaptors were ligated using NEB Quick T4 DNA ligase (cat.  
140 #M0202S) and purified using 0.6x AmPure beads. The final libraries were eluted in 15 µl of elution  
141 buffer. Sequencing was performed on a GridION X5 sequencer (Oxford Nanopore Technologies,  
142 Oxford, UK) using a SpotON R9.4 flow cell (FLO-MIN106) in a 48-hr sequencing protocol.

143 Nanopore raw reads (fast5 format) were base called (fastq5 format) using Guppy v2.3.4 software.  
144 Samples were run on two flow cells and generated a dataset of ~14 GB.

145

### 146 **Library preparation and sequencing on the Illumina platform**

147 Genomic DNA samples were quantified using the Qubit fluorometer. For each sample, 100 ng of  
148 DNA was fragmented to an average size of 350 bp by ultrasonication (Covaris ME220  
149 ultrasonicator). DNA sequencing libraries were prepared using dual-index adapters with the  
150 TruSeq Nano DNA Library Prep kit (Illumina) as per the manufacturer's protocol. The amplified  
151 libraries were checked on a Tape Station (Agilent Technologies) and quantified by real-time PCR  
152 using the KAPA Library Quantification kit (Roche) with the QuantStudio-7flex Real-Time PCR  
153 system (Thermo). Equimolar pools of sequencing libraries were sequenced using S4 flow cells in  
154 a Novaseq 6000 sequencer (Illumina) to generate 2 x 150-bp sequencing reads for 30x genome  
155 coverage per sample.

156

### 157 **Raw fastq files Illumina and nanopore reads**

158 The sample genome was of an adult female from the endogamous Parsi community which was  
159 used for the construction of 173X Zoroastrian Parsi Whole Genome Assembly. Illumina HiSeq  
160 with a read length of 2 X 150 bp is used for obtaining short reads for the genome. We obtained a  
161 total of 2.2 Billion sequences from the Illumina HiSeq platform (160X) and a total of 6.8 Million  
162 reads from the Nanopore platform. For the long reads, the library preparation was according to the  
163 standard protocol and the sequencing of the genome was performed using the Oxford Nanopore  
164 Minion platform

165

### 166 **Quality trimming and Quality control of the reads**

167 Quality trimming and adapter removal of the short Illumina platform reads was performed using  
168 AdapterRemoval (version 2.2.2)<sup>26</sup> with minlength 30, trimwindow size 30 and reads lesser than  
169 quality score of Q30 were discarded. For adapter removal of long Oxford nanopore reads,  
170 Porechop tool (V0.2.4)<sup>27</sup> with default options was used. The long error prone reads from Oxford

171 Nanopore cannot cross the quality score of Q20 hence the cutoff was kept to 8 in this case. All the  
172 quality scores are checked using FastQC (version 0.11.5)<sup>28</sup> and FastP (V0.20.1)<sup>29</sup> tool  
173 (**Supplementary Figure 1, 2**).

174

## 175 **Whole Genome assembly**

176 The quality trimmed and adapter removed short and long reads were processed for Hybrid  
177 assembly. The choice of hybrid assembly was made using relevant literature study where short  
178 read alone, long read alone and short-long read hybrid assemblies were compared for different  
179 cases<sup>30</sup> and hybrid assemblies outperformed and gave better QC statistics reflecting better quality  
180 of the assembled genomes. The raw data was sub sampled to 60X coverage with length cutoff of  
181 60 bp using fastP according to the instruction on the Wengan GitHub repository. The processed  
182 reads were assembled with Wengan<sup>31</sup> using D mode (uses DiscoverDenovo short-read assembler)  
183 with options -l ontraw, -g 3000 (3Gbp). An alternative assembly was generated by using HASLR,  
184 Wtdbg2<sup>32</sup>, WenganA and WenganM assemblers.

185

## 186 **Removing mis-assemblies at segmental duplications and centromere regions**

187 Centromere regions were downloaded from UCSC web browser for GRCh38 version of human  
188 reference genome. Segmental duplications in a BED format flat file was downloaded from the  
189 GitHub repository (segDupPlots/ucsc.collapsed.sorted.segdups). A python script<sup>20</sup> was used to  
190 remove miss-assemblies from Segmental duplications and centromere regions. Identification and  
191 annotations of repetitive elements was obtained using REPEATMASKER (V4.1.1)<sup>33</sup> by aligning  
192 the genome sequences against known library of repeats in humans.

193

## 194 **Read mapping and variant calling for Illumina sequencing reads**

195 The variant detection for the AGENOME-ZPGRF female sample was carried out using GATK  
196 pipeline (V4.1.5.0)<sup>35</sup>, Picard (2.21.9) and Samtools (1.3.1)<sup>36</sup>. The GATK pipeline included read  
197 mapping and variant processing. Single-nucleotide variants (SNVs) and indels were called by local  
198 reassembly of haplotypes using HaplotypeCaller of GATK V4.1.5.0.

199 The following workflow was used for variant calling, the raw reads were pre-processed, converted  
200 to unaligned BAM and readgroup information were assigned using FastqToSam. The adapters  
201 were tagged using MarkIlluminadapter function and the bam file were converted to interleaved  
202 fastq sequences to map to the reference genome. The reference genome (GRCh38) is indexed using  
203 BWA index and samtools, further the sequence dictionary for reference was obtained using picard  
204 CreateSequenceDictionary function. Mapping the FASTQ reads to reference genome was  
205 performed by BWA-MEM (version 0.7.17-r1188). Information from unaligned BAM and the  
206 aligned BAM were merged using MergeBaMAlignment to retain the raw read information. The  
207 duplicate reads through experimental artefacts are tagged using MarkDuplicates (picard) module.  
208 The base quality score recalibration (BQSR) was applied to overcome the errors associated with  
209 base quality score due to sequencing errors. The BAM file were further indexed to identify variants  
210 by HaplotypeCaller. The variants obtained from HaplotypeCaller were annotated using SnpEff  
211 (4.3t), a genetic variant annotation and effect prediction toolbox.

212

### 213 **Structural variants**

214 SVs were called using DELLY<sup>23</sup> with default parameters on duplicate marked bam file for  
215 germline SV calling (<https://github.com/dellytools/delly>).

216

### 217 **Pharmacogenomics relevance**

218 To assess the pharmacogenomics relevance, we obtained common variants in AGENOME-  
219 ZPGRF and dbSNP-138 database. These variants were annotated based on PharmGKB  
220 ([www.pharmgkb.org](http://www.pharmgkb.org)) database<sup>34</sup> to obtain pharmacogenomics association. The variants that were  
221 classified as conflicting-interpretation, uncertain significance and benign were removed. The  
222 variants that had Pharmacokinetic (PK) and Pharmacodynamic (PD) associations were considered  
223 to obtain actionable SNPs.

224

225

226



## 227 **Results**

### 228 **Benchmarking of hybrid assemblers for Whole Genome Assembly using Chr22**

229 *De novo* assembly was performed on a female Parsi whole-genome sequencing data. The data was  
230 in the form of Illumina-paired end 160X coverage and Oxford nanopore data of 13X. To  
231 standardize the pipeline, Chromosome 22 data (genome size of 52 Mbp) was extracted from the  
232 whole genome data and tested with iterative combination of different assembler strategy. The  
233 Illumina paired-end short reads with a read length of 150 bp were assembled using the Abyss<sup>35</sup>  
234 assembler resulting in a total length of 44,331,422 bp and a contig N50 of 15,753 bp.

235 We proceeded to use Hybrid assemblers known to perform scaffolding using long reads and  
236 polishing using short reads. Wengan assembler outperformed all other hybrid assemblers by  
237 producing a total length of 32,346,746 bp with 194 contigs greater than 50,000 bp. Quickmerge<sup>36</sup>  
238 meta-assembler was applied on Wengan assembly which gave the lowest number of contigs versus  
239 length and Abyss (160X) gave the longest length with the higher number of contigs improving the  
240 contiguity of the assembly. The results for this exercise produced a total length of 50,216,737 bp  
241 which is close to 90% of the total length of Chr22 and 2,675 contigs (**Appendix 1**).

242

### 243 ***De novo* assembly of the First complete Zoroastrian Parsi Whole Genome Reference Female** 244 **(AGENOME-ZPGRF)**

245 Following the assembly of Chr22, we extended our meta-assembly strategy to assemble the whole  
246 genome reference (**Figure 1**). Our Zoroastrian-Parsi genome (AGENOME-ZPGRF) is based on  
247 high-quality *de novo* assembly from one female Parsi individual. The assembly was generated  
248 from a combination of short and long read data sets: 2x150 bp Illumina paired-end reads (160X),  
249 Oxford Nanopore (13X) reads averaging over 5,784 bp in length (**Table 1**).

250 We initially created five hybrid assemblies using Illumina short reads and Oxford Nanopore  
251 Technology long reads. Three assemblies were based on Synthetic Scaffolding Graph approach  
252 using Wengan hybrid genome assembler, one assembly based on synthetic paired end reads using  
253 HASLR and one assembly based on fuzzy De-Brujin graph method using wtdbg2. WenganD gave  
254 the best results with respect to total length of 2.7 Giga bases (Gbp), N50 of 2 Mega bases (Mbp)

255 and genomic fraction of 93.2%. The annotation based on QUASt-LG identified 14,996 complete  
256 and 5,837 partial number of genomic features (**Table 2**). The Parsi reference genome,  
257 AGENOME-ZPGRF, contains 2,778,216,114 nucleotides as compared to 3,096,649,726 in  
258 GRCh38. This assembly, designated AGENOME-ZPGRF, was the basis for all subsequent  
259 refinements and analysis.

260

### 261 **Completeness of the genome**

262 Gene completeness was measured with BUSCO54 v.4.1.4<sup>37</sup> using the Primates ODB-10 gene set.  
263 BUSCO provides intuitive metrics to describe genome, gene set or transcriptome completeness<sup>38</sup>.  
264 We observed 88.3% of genome completeness, 12,165 complete BUSCOs, 12,113 complete and  
265 single copy BUSCOs, 52 complete and duplicated BUSCOs, 461 fragmented BUSCOs, 1,154  
266 missing BUSCOs. The total BUSCO group searched was 13,780.

267

### 268 **Repeated elements in AGENOME-ZPGRF**

269 When annotating repeats with REPEATMASKER, about 48.34% of the genome (**Table 3**) was  
270 identified as repetitive, with its results similar to those from EGYPTRef, AK1 and YORUBA  
271 genome assemblies. Most of the repetitive elements comprised of 21.80% Long Interspersed  
272 Nuclear Elements (LINEs), 13.45% of Short Interspersed Nuclear Elements (SINEs) and the rest  
273 in ALU elements, Mammalian-wide Interspersed Repeats (MIRs), Long Terminal Repeats (LTR)  
274 elements, DNA elements, small RNAs, satellites and simple repeats. Further, we found that about  
275 two-thirds of the SNPs identified in the repeat regions were found in long interspersed elements  
276 (LINE; 21.80%; majority occurring in LINE1 elements) or short interspersed elements.

277

### 278 **Variant identification**

279 We used the GATK variant calling pipeline, performed according to GATK best-practice  
280 recommendations and the HaplotypeCaller tool was employed for identifying putative variants,  
281 followed by Snpeff (build 2017-11-24) to annotate and make functional predictions. Our analysis  
282 revealed 5,426,310 variants of which 79% are SNPs (4,291,601) and 21% are indels, multiple-

283 nucleotide polymorphism (MNPs) and mixed variants (**Figure 2**). The transitions (297,330),  
284 transversions (251,540), Ts/Tv, ratio was 1.18, resembling expected figures in similar studies.  
285 Among the identified SNPs, 41.40% were intronic and 40.78% were intergenic while the rest were  
286 SNPs in the upstream (8.84%) and downstream region (7.19%). SNPs in the exonic region  
287 constituted only 0.5% of the total SNP count and the SNPs in the untranslated 3' or 5' region made  
288 up the rest (**Figure 2, Supplementary Figure 3**). Of these SNPs, 14,572 were missense (non-  
289 synonymous), 13,321 were silent (synonymous) substitutions and 189 nonsense SNPs. This is  
290 consistent with a non-syn:syn (dN/dS) ratio of ~1 expected of a normal genome<sup>39</sup>.

291 Based on the SNPEff<sup>40</sup> annotation, we sought to identify the functional impact of the SNP's in  
292 terms of "high", "low", "moderate" impact based on their occurrence on the genome. High impact  
293 SNPs occur when (i) the variant hits a splice acceptor/donor site, (ii) a start codon is changed into  
294 a nonstart codon, or (iii) a stop codon is gained or lost due to the variant. We identified 1652 SNPs  
295 with a high-impact effect (**Appendix 2**), 16128 with low impact and 14856 with moderate impact.  
296 The majority of the high impact variants occurred on the gene *DPP6* (n=2920, **Appendix 4, 6**),  
297 variants of which have been reported to be associated to familial idiopathic ventricular  
298 fibrillation<sup>41</sup>.

299 Out of the ~4.2 million SNPs identified, there were 960,867 potentially novel SNPs that did not  
300 exist in dbSNP<sup>42</sup> (**Appendix 3, 7**). Further analysis of the AGENOME-ZPGRF specific novel  
301 SNPs showed, 50.9% and 31.2% were in intergenic and intronic regions, respectively. We found  
302 9.2% were upstream, 7.17% downstream of a gene, and 4202 (or 0.49%) of the SNPs were found  
303 to be in coding regions (**Table 5**). Among the 4202 SNPs in coding regions, we could further  
304 classify 31 nonsense SNPs and a total of 415 SNPs with a high impact (**Appendix 5**). Most of the  
305 variants (both genomewide and AGENOME-ZPGRF specific variants) occurred on Chr1, while  
306 the highest frequency of distribution occurred on Chr22 (**Table 4**). We identified 1,133,653 indels,  
307 which consisted of 546,985 insertions and 586,668 deletions. Of these indels, 503,214 (or 44%)  
308 were found to be novel. Majority of the unique variants occurred on LOC105379427 (n=1552,  
309 **Appendix 4**) that code for zinc finger protein 717-like proteins (putative) and  
310 *DUX4L18/DUX4L19/CNTNAP3B* genes which have been implicated in cognitive disorders.

311 The high impact SNPs across the AGENOME-ZPGRF genome are distributed among 1,014  
312 protein-coding genes in the genome and 311 non-coding regions. We next classified the high

313 impact variants to understand the significance of the coding (sSNPs) and non-coding SNPs  
314 (nsSNPs), in terms of their distribution in protein class, pathways, biochemical activity with  
315 KEGG<sup>43</sup> pathways using DAVID<sup>44</sup>. The distribution of both high impact sSNPs and nsSNPs was  
316 significantly enriched in G protein coupled receptor pathway genes, olfactory transduction. Our  
317 finding is consistent with studies that demonstrate higher levels of polymorphism observed in  
318 human olfactory gene family<sup>45</sup>. In addition, we found enrichment for pathways associated with  
319 neuroactive ligand-receptor and osteoclast differentiation. The majority of the high impact coding  
320 SNPs belonged to transmembrane helices, transmembrane and receptor protein classes. Reactome  
321 based pathway analysis<sup>46</sup> showed that pathways for antigen presentation: Folding, assembly and  
322 peptide loading constituted the major pathway implicated for genes harboring the coding and non-  
323 coding SNPs (**Figure 4**).

324

### 325 **Genetic structural variation in AGENOME-ZPGRF**

326 Using short-read sequencing data of AGENOME-ZPGRF, we called 69,148 SVs using DELLY2  
327 structural variant prediction tool<sup>33</sup> (**Figure 3**). We observed that while most of the SVs were  
328 deletions (n=40070), we found other SVs categorized as inversions (n=6004), duplications  
329 (n=5808), insertions (n=2129) and translocations (n=15137). No mis-assemblies were observed  
330 outside centromeric regions and segmental duplication regions.

331

### 332 **Pharmacogenomics and drug risk assessment using AGENOME-ZPGRF SNPs**

333 One of the aims of personalized genomics is to assess the individuals SNPs for disease and drug  
334 reaction assessment aiding drug dosage regimens. Using the variant-drug risk correlation  
335 annotation in the PharmGKB database<sup>34</sup> and KEGG database, we sought to understand SNPs of  
336 pharmacogenomic relevance in the AGENOME-ZPGRF. We identified 20 unique SNPs  
337 (**Appendix 8**) associated with 12 genes distributed across 9 chromosomes (chr1,2,4,7,8,11,14,15  
338 and 16) with pharmacogenomic relevance based on PharmGKB (**Appendix 7**). We identified 10  
339 actionable SNPs from literature as it pertains to treatment with various drugs, some of which are  
340 also represented in the PharmGKB (Table 3).

## 341 **Discussion**

342 We present the first, high depth whole Zoroastrian-Parsi Genome Reference Female sequence,  
343 AGENOME-ZPGRF for the Zoroastrian-Parsi population of India. The AGENOME-ZPGRF is a  
344 high depth whole genome sequence at 173X, combining genomic reads from short read (160X;  
345 Illumina) and long read (8X; 5X; Oxford Nanopore Technologies) sequencing technologies.  
346 AGENOME-ZPGRF represents the first high depth whole genome sequence from the Indian  
347 subcontinent, where there have been previous genome assemblies of male<sup>47,22</sup> and female<sup>21</sup> at  
348 <40X. AGENOME-ZPGRF, contains 2,778,216,114 nucleotides as compared to 3,096,649,726 in  
349 GRCh38. AGENOME-ZPGRF is unique as it is derived almost entirely from a single individual  
350 unlike GRCh38, which represents a mosaic of multiple individuals, thereby, adding further insight  
351 into personal genome and variant-disease association approaches. We have extended our study to  
352 sequence the first Zoroastrian-Parsi male genome, presently 2,589,561,354 bp in length with  
353 87.46% genome fraction mapping to GRCh38 (**Appendix 9**).

354 The genome completeness is 93.25% which is on par compared to other high resolution whole  
355 genomes from the Ashkenazi<sup>16</sup>, Egypt ref<sup>48</sup> and Yoruba genome<sup>49</sup> assembly projects. Our assembly  
356 quality is further enhanced by BUSCO completeness score of 88.3% validating our benchmarking  
357 process for genome completeness. Annotation identified 20,833 genomic features, of which 14,996  
358 are > 99% identical to their counterparts on GRCh38. Most of the remaining genes were partial.  
359 This assembly, designated AGENOME-ZPGRF, was the basis for all subsequent refinements. Our  
360 analysis revealed 5,426,310 variants of which 79% are SNPs (4,291,601) and 21% are indels,  
361 MNPs and mixed variants. AGENOME-ZPGRF had 960,867 novel/personal SNPs not listed on  
362 dbSNP. The AGENOME-ZPGRF reference standard of this endogamous, socially, genetically  
363 divergent community adds valuable insights into human population genetic diversity as compared  
364 to other global populations. Furthermore, our study adds information to the catalogue of genomic  
365 variation derived from the 1000 human genome project consortium, which also includes samples  
366 of Indian origin (1000 Genomes Project Consortium).

367 Besides the nuclear genome, we had previously studied AGENOME-ZPGRF mitochondrial  
368 genome variants<sup>50</sup> as the first *de novo* Zoroastrian-Parsi mitochondrial genome, AGENOME-  
369 ZPMS-HV2a-1 (Genbank accession, [MT506314](#)). Our analysis showed that the AGENOME-  
370 ZPGRF belongs to haplogroup HV2a and that showed 28 unique variants compared with the

371 revised Cambridge Reference Standard (rCRS). HV2a is an extremely rare haplogroup, and  
372 prevalent among the Zoroastrians-Parsis in our study cohort. The haplogroup HV2a is closely  
373 associated with Caucasian descent, with its documented prevalence dating back to ancient  
374 Scythians who were geographically distinct group of nomads joined by common cultural  
375 expressions<sup>57</sup>. They date back to about the 9th century BCE until the 4th century CE<sup>56</sup> tracing their  
376 origins to the Caspian Pontic Steppes and the Altai mountains<sup>51</sup>, indicative of the unique genomic  
377 landscape of the contemporary Zoroastrian-Parsi among Indian and European communities.

378 Variants in personal genomes can be used to assess disease risk, carrier status and drug  
379 response/interaction contributing to a pharmacogenomic insights in clinical genetics. We have  
380 assessed the AGENOME-ZPGRF genome using OMIM, PharmaGKB and KEGG databases for  
381 SNPs with health and disease consequences. We identified high risk for Multiple sclerosis, among  
382 other diseases that include cancers and neurodegenerative diseases. We found two *CHRNA3*,  
383 *CHRNA5* alleles: rs16969968, rs1051730 gene variants that have been associated with cognition,  
384 possibly mediating in part risk for developing Nicotine Dependence<sup>52,53</sup>. We also found a C>A  
385 variant in *C11orf65* located near ATM gene regulating metformin response in Type 2 diabetics<sup>54</sup>.  
386 Additionally, we found intronic variant (rs762551) in *CYP1A2* associated with leflunomide  
387 induced toxicity in treatment for Rheumatoid Arthritis<sup>55</sup>. In the context of preventive  
388 pharmacogenomics association, we found the AGENOME-ZPGRF, harbored a SNP (C>T) in  
389 *DPYD;DPYD-AS1* implicated in fatal consequences to 5-Fluorouracil (5-FU)-based treatments  
390 (4%-5%, early onset-severe to 0.3%, fatal) in patients with dihydropyrimidine dehydrogenase  
391 (DPD) deficiency.

392 In sum, our present study has delivered the first, complete, *de novo*, high depth genome assembly  
393 AGENOME-ZPGRF for Zoroastrian Parsi community of India. Analysis of the variants in  
394 AGENOME-ZPGRF indicated 960,867 novel/personal SNPs, some of which were found  
395 associated with adverse drug interactions in separate studies. We have also completed the whole  
396 genome assembly of a Zoroastrian-Parsi male, whose variant annotation is underway. Further  
397 analysis of personal variant-disease-drug response annotations that are gender specific made using  
398 clinically validated variants will complement current healthcare practices with personalized  
399 pharmacogenomics. This will lead to safe, accurate, drug dosage and treatment regimen by  
400 physicians and clinical trials.

401 **Declarations:**

402

403 **Ethics approval and consent to participate.**

404

405 We would like to state that this ethics review board is not affiliated with a commercial entity, and  
406 we confirm that the Ethics Review was sought from an independent ethics review board not  
407 affiliated with the funder or the commercial entity, in line with Declaration of Helsinki that the  
408 "committee must be transparent in its functioning, must be independent of the researcher, the  
409 sponsor and any other undue influence and must be duly qualified".

410

411 The study was approved by the Institutional BioEthics Committee constituted by the Department  
412 of Biotechnology, Government of India (BIAG-CSP-033). The committee constituted is compliant  
413 with the scientific, medical, ethical, legal and social requirements of the research proposal and in  
414 line with the 1964 Helsinki declaration and its later amendments. All subjects have provided  
415 written informed consent for the collection of samples and subsequent analysis.

416 **Competing interests**

417

418 The authors declare that they have no known competing financial interests or personal  
419 relationships that could have appeared to influence the work reported in this paper.

420

421 **Funding**

422

423 The project was funded by the grant awarded to Dr.Villoo Morawala-Patell, titled "Cancer risk in  
424 smoking subjects assessed by next-generation sequencing profile of circulating free DNA and  
425 RNA" (GG-0005) by the Foundation for a Smoke-Free World, New York, USA.

426

427 **Acknowledgements**

428

429 We would like to thank Dr.Raja Mugasimangalam and Dr. Sudha Rao, Genotypic Technologies,  
430 for their valuable inputs, Dr.Paul Morill and Dr.Farah Patell Socha for their excellent project  
431 management and guidance regarding GG-0005, Dr.Sanaya Patell McGaw for editorial assistance  
432 and Ms.Mahima Kishinani, Ms.Janet Rymound for contributing to literature review and analysis.

433 We thank the Zoroastrian-Parsi community of India for their enthusiastic cooperation and the The  
434 Avestagenome Project<sup>®</sup> project team.



## 435 References

- 436
- 437 1. Thermes, C. Ten years of next-generation sequencing technology. *Trends in genetics : TIG* (2014) doi:10.1016/j.tig.2014.07.001.
- 438
- 439 2. Koboldt, D. C., Steinberg, K. M., Larson, D. E., Wilson, R. K. & Mardis, E. R. XThe next-generation sequencing revolution and its impact on genomics. *Cell* (2013)
- 440 doi:10.1016/j.cell.2013.09.006.
- 441
- 442 3. Schatz, M. C., Delcher, A. L. & Salzberg, S. L. Assembly of large genomes using second-
- 443 generation sequencing. *Genome Research* (2010) doi:10.1101/gr.101360.109.
- 444 4. Zhao, J. & F.A. Grant, S. Advances in Whole Genome Sequencing Technology. *Curr.*
- 445 *Pharm. Biotechnol.* (2011) doi:10.2174/138920111794295729.
- 446 5. Zhou, X. G. *et al.* The next-generation sequencing technology: A technology review and
- 447 future perspective. *Science China Life Sciences* (2010) doi:10.1007/s11427-010-0023-6.
- 448 6. He, Y. *et al.* De novo assembly of a Tibetan genome and identification of novel structural
- 449 variants associated with high-altitude adaptation. *Natl. Sci. Rev.* (2020)
- 450 doi:10.1093/nsr/nwz160.
- 451 7. Gudbjartsson, D. F. *et al.* Large-scale whole-genome sequencing of the Icelandic
- 452 population. *Nat. Genet.* (2015) doi:10.1038/ng.3247.
- 453 8. Maretty, L. *et al.* Sequencing and de novo assembly of 150 genomes from Denmark as a
- 454 population reference. *Nature* (2017) doi:10.1038/nature23264.
- 455 9. Yang, X., Lee, W. P., Ye, K. & Lee, C. One reference genome is not enough. *Genome*
- 456 *Biol.* (2019) doi:10.1186/s13059-019-1717-0.
- 457 10. Guo, Y. *et al.* Improvements and impacts of GRCh38 human reference on high throughput
- 458 sequencing data analysis. *Genomics* (2017) doi:10.1016/j.ygeno.2017.01.005.
- 459 11. Belmont, J. W. *et al.* The international HapMap project. *Nature* (2003)
- 460 doi:10.1038/nature02168.
- 461 12. Auton, A. *et al.* A global reference for human genetic variation. *Nature* (2015)
- 462 doi:10.1038/nature15393.
- 463 13. Cavalli-Sforza, L. L. The human genome diversity project: Past, present and future.
- 464 *Nature Reviews Genetics* (2005) doi:10.1038/nrg1596.
- 465 14. Zhou, D. *et al.* Polymorphisms involving gain or loss of CpG sites are significantly
- 466 enriched in trait-associated SNPs. *Oncotarget* (2015) doi:10.18632/oncotarget.5650.
- 467 15. Cai, R., Dong, Y., Fang, M., Guo, C. & Ma, X. De novo genome assembly of a Han
- 468 Chinese male and genome-wide detection of structural variants using Oxford Nanopore
- 469 sequencing. *Mol. Genet. Genomics* (2020) doi:10.1007/s00438-020-01672-y.
- 470 16. Shumate, A. *et al.* Assembly and annotation of an Ashkenazi human reference genome.
- 471 *Genome Biol.* (2020) doi:10.1186/s13059-020-02047-7.
- 472 17. Seo, J. S. *et al.* De novo assembly and phasing of a Korean human genome. *Nature* (2016)
- 473 doi:10.1038/nature20098.
- 474 18. Fujimoto, A. *et al.* Whole-genome sequencing and comprehensive variant analysis of a
- 475 Japanese individual using massively parallel sequencing. *Nat. Genet.* (2010)
- 476 doi:10.1038/ng.691.
- 477 19. Dogan, H., Can, H. & Otu, H. H. Whole genome sequence of a turkish individual. *PLoS*
- 478 *One* (2014) doi:10.1371/journal.pone.0085233.
- 479 20. Wohlers, I. *et al.* An integrated personal and population-based Egyptian genome

- reference. *bioRxiv* (2019) doi:10.1101/681254.
- 481 21. Gupta, R. *et al.* Sequencing and analysis of a South Asian-Indian personal genome. *BMC*  
482 *Genomics* (2012) doi:10.1186/1471-2164-13-440.
- 483 22. Kitzman, J. O. *et al.* Haplotype-resolved genome sequencing of a Gujarati Indian  
484 individual. *Nat. Biotechnol.* (2011) doi:10.1038/nbt.1740.
- 485 23. Bamshad, M. *et al.* Genetic evidence on the origins of Indian caste populations. *Genome*  
486 *Res.* (2001) doi:10.1101/gr.GR-1733RR.
- 487 24. Reich, D., Thangaraj, K., Patterson, N., Price, A. L. & Singh, L. Reconstructing Indian  
488 population history. *Nature* (2009) doi:10.1038/nature08365.
- 489 25. Brahmachari, S. K. *et al.* The Indian Genome Variation database (IGVdb): A project  
490 overview. *Human Genetics* (2005) doi:10.1007/s00439-005-0009-9.
- 491 26. Lindgreen, S. AdapterRemoval: Easy cleaning of next-generation sequencing reads. *BMC*  
492 *Res. Notes* (2012) doi:10.1186/1756-0500-5-337.
- 493 27. Wick, R. R. Porechop. *Github* <https://github.com/rrwick/Porechop> (2017).
- 494 28. Andrews, S. FastQC. *Babraham Bioinforma.* (2010).
- 495 29. Chen, S., Zhou, Y., Chen, Y. & Gu, J. Fastp: An ultra-fast all-in-one FASTQ  
496 preprocessor. in *Bioinformatics* (2018). doi:10.1093/bioinformatics/bty560.
- 497 30. Di Genova, A., Buena-Atienza, E., Ossowski, S. & Sagot, M.-F. Efficient hybrid de novo  
498 assembly of human genomes with WENGAN. *Nat. Biotechnol.* (2020)  
499 doi:10.1038/s41587-020-00747-w.
- 500 31. Genova, A. Di, Buena-Atienza, E., Ossowski, S. & Sagot, M. F. WENGAN: Efficient and  
501 high quality hybrid de novo assembly of human genomes. *bioRxiv* (2019)  
502 doi:10.1101/840447.
- 503 32. Ruan, J. & Li, H. Fast and accurate long-read assembly with wtdbg2. *Nat. Methods* (2020)  
504 doi:10.1038/s41592-019-0669-3.
- 505 33. Rausch, T. *et al.* DELLY: Structural variant discovery by integrated paired-end and split-  
506 read analysis. *Bioinformatics* (2012) doi:10.1093/bioinformatics/bts378.
- 507 34. Whirl-Carrillo, M. *et al.* Pharmacogenomics knowledge for personalized medicine.  
508 *Clinical Pharmacology and Therapeutics* (2012) doi:10.1038/clpt.2012.96.
- 509 35. Simpson, J. T. *et al.* ABySS: A parallel assembler for short read sequence data. *Genome*  
510 *Res.* (2009) doi:10.1101/gr.089532.108.
- 511 36. Quinn, M. J. Parallel sorting algorithms for tightly coupled multiprocessors. *Parallel*  
512 *Comput.* (1988) doi:10.1016/0167-8191(88)90075-0.
- 513 37. Seppey, M., Manni, M. & Zdobnov, E. M. BUSCO: Assessing genome assembly and  
514 annotation completeness. in *Methods in Molecular Biology* (2019). doi:10.1007/978-1-  
515 4939-9173-0\_14.
- 516 38. Simão, F. A., Waterhouse, R. M., Ioannidis, P., Kriventseva, E. V. & Zdobnov, E. M.  
517 BUSCO: Assessing genome assembly and annotation completeness with single-copy  
518 orthologs. *Bioinformatics* (2015) doi:10.1093/bioinformatics/btv351.
- 519 39. Kryazhimskiy, S. & Plotkin, J. B. The Population Genetics of dN/dS. *PLOS Genet.* **4**, 1–  
520 10 (2008).
- 521 40. Cingolani, P. *et al.* A program for annotating and predicting the effects of single  
522 nucleotide polymorphisms, SnpEff: SNPs in the genome of *Drosophila melanogaster*  
523 strain w1118; iso-2; iso-3. *Fly (Austin)*. (2012) doi:10.4161/fly.19695.
- 524 41. Alders, M. *et al.* Haplotype-Sharing Analysis Implicates Chromosome 7q36 Harboring  
525 DPP6 in Familial Idiopathic Ventricular Fibrillation. *Am. J. Hum. Genet.* (2009)

- 526 doi:10.1016/j.ajhg.2009.02.009.
- 527 42. Sherry, S. T. *et al.* dbSNP: The NCBI database of genetic variation. *Nucleic Acids Res.*  
528 (2001) doi:10.1093/nar/29.1.308.
- 529 43. Kanehisa, M. & Subramaniam. The KEGG database. in *Novartis Foundation Symposium*  
530 (2002). doi:10.1002/0470857897.ch8.
- 531 44. Dennis, G. *et al.* DAVID: Database for Annotation, Visualization, and Integrated  
532 Discovery. *Genome Biol.* (2003) doi:10.1186/gb-2003-4-9-r60.
- 533 45. Hasin-Brumshtein, Y., Lancet, D. & Olender, T. Human olfaction: from genomic variation  
534 to phenotypic diversity. *Trends in Genetics* (2009) doi:10.1016/j.tig.2009.02.002.
- 535 46. Fabregat, A. *et al.* The Reactome Pathway Knowledgebase. *Nucleic Acids Res.* (2018)  
536 doi:10.1093/nar/gkx1132.
- 537 47. Almal, S. *et al.* Sequencing and analysis of the whole genome of Indian Gujarati male.  
538 *Genomics* (2019) doi:10.1016/j.ygeno.2018.02.003.
- 539 48. Wohlers, I. *et al.* An integrated personal and population-based Egyptian genome  
540 reference. *Nat. Commun.* (2020) doi:10.1038/s41467-020-17964-1.
- 541 49. Bentley, D. R. *et al.* Accurate whole human genome sequencing using reversible  
542 terminator chemistry. *Nature* (2008) doi:10.1038/nature07517.
- 543 50. Patell, V. M. *et al.* The First Complete Zoroastrian-Parsi Mitochondrial Reference  
544 Genome and genetic signatures of an endogamous non-smoking population. *bioRxiv*  
545 2020.06.05.124891 (2021) doi:10.1101/2020.06.05.124891.
- 546 51. Reinhard, J. Sharp eyes of science probe the Mummies of Peru. *Natl. Geogr. Mag.* (1997).
- 547 52. Winterer, G. *et al.* Risk gene variants for nicotine dependence in the CHRNA5-CHRNA3-  
548 CHRN4 cluster are associated with cognitive performance. *Am. J. Med. Genet. Part B*  
549 *Neuropsychiatr. Genet.* (2010) doi:10.1002/ajmg.b.31126.
- 550 53. Saccone, N. L. *et al.* The CHRNA5-CHRNA3-CHRN4 nicotinic receptor subunit gene  
551 cluster affects risk for nicotine dependence in African-Americans and in European-  
552 Americans. *Cancer Res.* (2009) doi:10.1158/0008-5472.CAN-09-0786.
- 553 54. Zhou, K. *et al.* Common variants near ATM are associated with glycemic response to  
554 metformin in type 2 diabetes. *Nature Genetics* (2011) doi:10.1038/ng.735.
- 555 55. Bohanec Grabar, P. *et al.* Genetic polymorphism of CYP1A2 and the toxicity of  
556 leflunomide treatment in rheumatoid arthritis patients. *Eur. J. Clin. Pharmacol.* (2008)  
557 doi:10.1007/s00228-008-0498-2.
- 558 56. Rolle R. 2011. The Scythians: Between Mobility, Tomb Architecture, and Early Urban  
559 Structures. In: Bonfante L, editor. *The Barbarians of Ancient Europe : Realities and*  
560 *Interactions.* Cambridge; New York: Cambridge University Press. p 107- 131.
- 561 57. Damgaard PdB, Marchi N, Rasmussen S, Peyrot M, Renaud G, Korneliusen T, Moreno-  
562 Mayar JV, Pedersen MW, Goldberg A, Usmanova E *et al.* 2018. 137 ancient human  
563 genomes from across the Eurasian steppes. *Nature* 557(7705):369-374.

564

565

566

567

568

569

## Figures

570 **Figure 1**

571

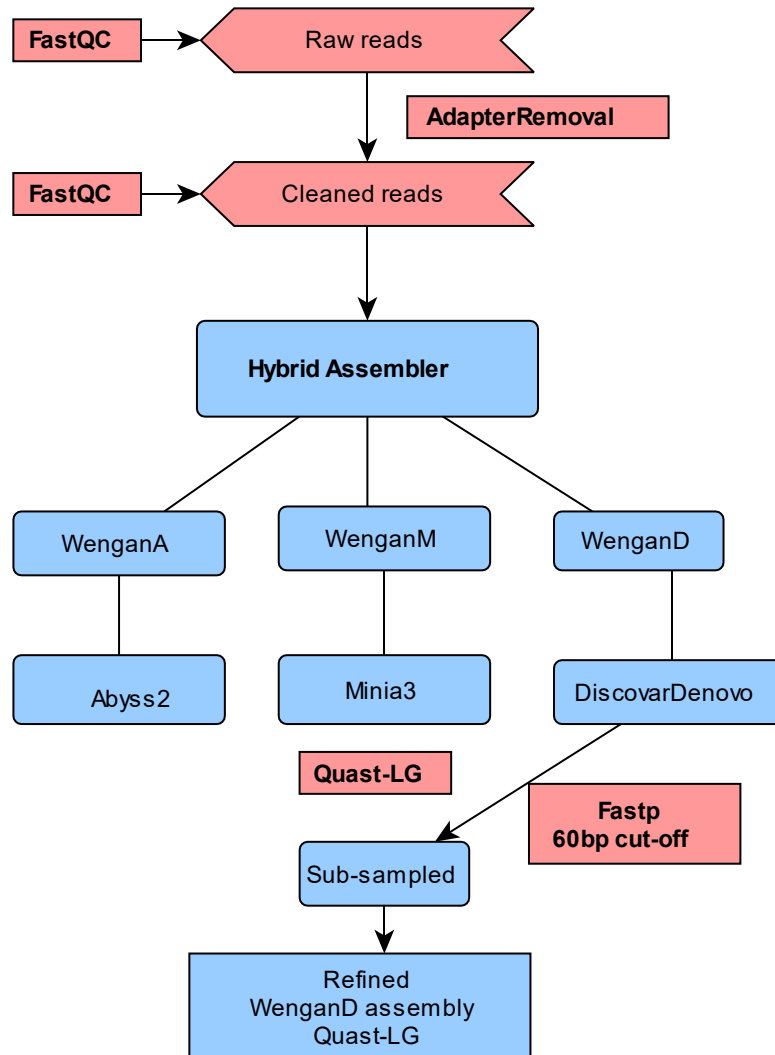

572

573

574 **Figure 1:** Workflow detailing meta-assembly protocol using iterative combinations of hybrid

575 assemblers to generate the first Zoroastrian-Parsi Genome, AGENOME-ZPGRF

576

577

578

579 **Figure 2**

580

581 **A)**

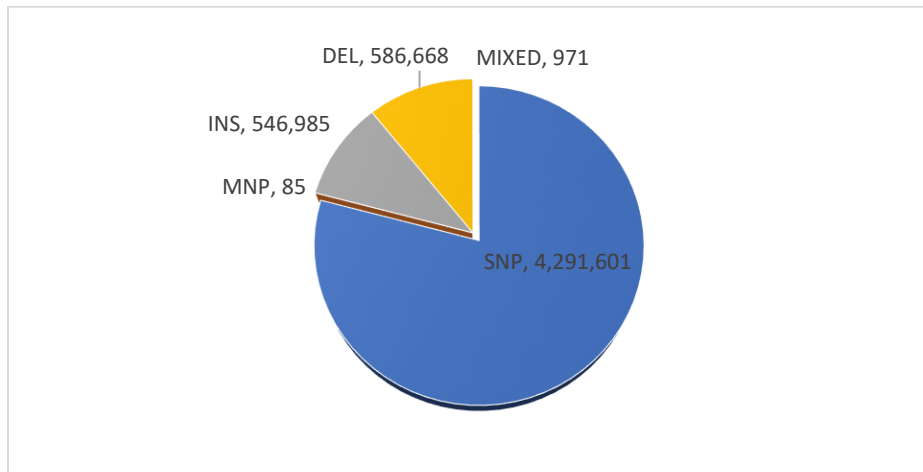

582

583 **B)**

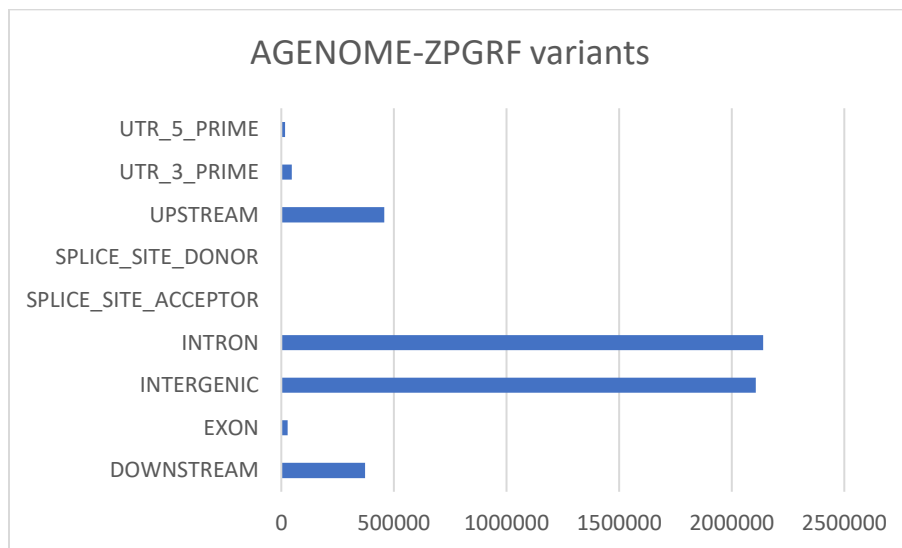

584

585

586 **Figure 2:** Distribution of variant types (A) and location in genomic regions (B) identified in the

587 AGENOME-ZPGRF

588

589

590 **Figure 3**

591

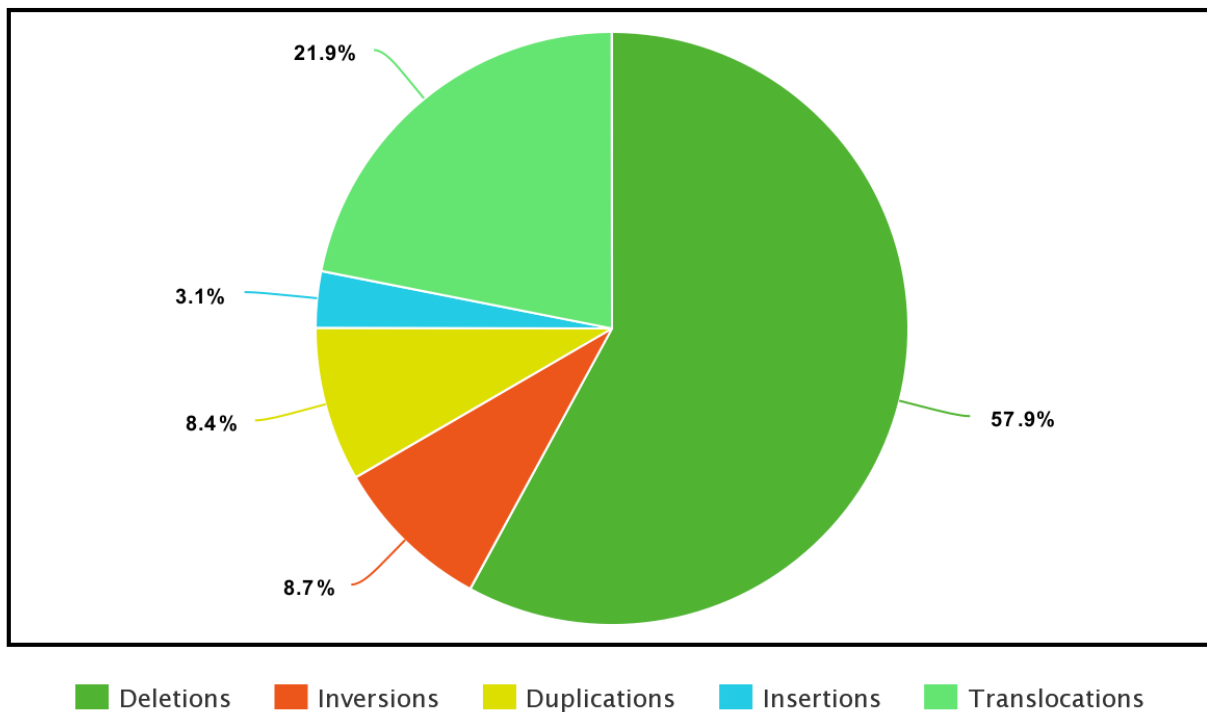

592

593

594

595 **Figure 3:** Distribution of Structural Variant (SV) calls in the assembled first Zoroastrian-Parsi

596 Genome, AGENOME-ZPGRF; The breakdown of the SV's is as follows: deletions (n=40070),

597 inversions (n=6004), duplications (n=5808), Insertion (n=2129) and translocations (n=15137).

598

599

600

601

602

603

604

605

606

607 **Figure 4:**

608 **A)**

| Term                                                                   | Count | P-Value  | Fold Enrichment |
|------------------------------------------------------------------------|-------|----------|-----------------|
| <b>GOTERM_BP_DIRECT</b>                                                |       |          |                 |
| detection of chemical stimulus involved in sensory perception of smell | 8     | 2.50E-07 | 1.40E+01        |
| G-protein coupled receptor signaling pathway                           | 9     | 2.90E-06 | 7.50E+00        |
| adaptive immune response                                               | 3     | 1.20E-02 | 1.10E+01        |
| sensory perception of smell                                            | 3     | 1.40E-02 | 1.10E+01        |
| cell adhesion                                                          | 3     | 9.40E-02 | 3.70E+00        |
| <b>INTERPRO</b>                                                        |       |          |                 |
| G protein-coupled receptor, rhodopsin-like                             | 10    | 5.90E-08 | 1.00E+01        |
| GPCR, rhodopsin-like, 7TM                                              | 10    | 7.20E-08 | 9.90E+00        |
| Olfactory receptor                                                     | 8     | 4.30E-07 | 1.30E+01        |
| Immunoglobulin-like domain                                             | 8     | 2.10E-05 | 7.30E+00        |
| Immunoglobulin subtype                                                 | 6     | 2.40E-04 | 8.10E+00        |
| <b>KEGG_PATHWAY</b>                                                    |       |          |                 |
| Olfactory transduction                                                 | 8     | 6.80E-08 | 1.20E+01        |
| Osteoclast differentiation                                             | 1     | 1.00E+00 | 0.00E+00        |
| Neuroactive ligand-receptor interaction                                | 1     | 1.00E+00 | 0.00E+00        |
| <b>UP_KEYWORDS</b>                                                     |       |          |                 |
| Glycoprotein                                                           | 22    | 2.60E-12 | 4.00E+00        |
| Disulfide bond                                                         | 19    | 1.40E-10 | 4.50E+00        |
| Transmembrane helix                                                    | 22    | 2.10E-10 | 3.20E+00        |
| Transmembrane                                                          | 22    | 2.20E-10 | 3.20E+00        |
| Membrane                                                               | 23    | 3.30E-09 | 2.50E+00        |
| Receptor                                                               | 13    | 3.90E-08 | 6.20E+00        |
| G-protein coupled receptor                                             | 10    | 1.50E-07 | 9.20E+00        |
| Transducer                                                             | 10    | 2.60E-07 | 8.60E+00        |
| Olfaction                                                              | 8     | 3.70E-07 | 1.40E+01        |
| Cell membrane                                                          | 15    | 8.60E-07 | 3.80E+00        |
| Sensory transduction                                                   | 8     | 3.10E-06 | 9.90E+00        |

609

610 **B)**

| Pathway name                                                               | Entities mapped | Total Entities | Entities pValue | Entities FDR |
|----------------------------------------------------------------------------|-----------------|----------------|-----------------|--------------|
| Antigen Presentation: Folding, assembly and peptide loading of class I MHC | 35              | 102            | 1.11E-16        | 5.55E-15     |
| Endosomal/Vacuolar pathway                                                 | 35              | 82             | 1.11E-16        | 5.55E-15     |
| ER-Phagosome pathway                                                       | 35              | 165            | 1.11E-16        | 5.55E-15     |
| Antigen processing-Cross presentation                                      | 35              | 187            | 1.11E-16        | 5.55E-15     |
| Class I MHC mediated antigen processing & presentation                     | 36              | 465            | 5.44E-15        | 2.39E-13     |
| Adaptive Immune System                                                     | 45              | 1003           | 2.34E-10        | 9.37E-09     |
| Cytokine Signaling in Immune system                                        | 45              | 1108           | 5.12E-09        | 1.84E-07     |
| Vpr-mediated induction of apoptosis by mitochondrial outer membrane p      | 2               | 4              | 0.001913956     | 0.063161     |
| Immune System                                                              | 59              | 2713           | 0.005544705     | 0.166341     |

611

612 **Figure 4:** Enrichment of AGENOME-ZPGRF novel high impact variant across different databases  
 613 like (A) DAVID and (B) Reactome

614

615

616 **Table 1**

617

| Sequence technology | Total reads (bp) | Mean read length(bp) | Coverage |
|---------------------|------------------|----------------------|----------|
| Illumina-library-1  | 1422887753       | 151                  | 100X     |
| Illumina-library-2  | 322537951        | 150                  | 30X      |
| Illumina-library-3  | 479650511        | 151                  | 30X      |
| ONT-library-1       | 3318994          | 4566                 | 5X       |
| ONT-library-2       | 3515835          | 7002                 | 8X       |

618

619

620 **Table 1:** Sequence data for assembly of *De novo* Zoroastrian-Parsi Genome Reference Female  
621 genome (AGENOME-ZPGRF)

622

623

624

625

626

627

628

629

630

631

632

633

634

635

636

637



638 **Table 2**

| <b>Genome statistics</b>   | <b>AGENOME-ZPGRF</b>     | <b>EGYPT</b>             | <b>AK1</b>               | <b>YORUBA</b>            |
|----------------------------|--------------------------|--------------------------|--------------------------|--------------------------|
| <b># contigs</b>           | <b>4806</b>              | <b>3235</b>              | <b>2832</b>              | <b>1647</b>              |
| # contigs (>= 0 bp)        | 4806                     | 3724                     | 2832                     | 1741                     |
| # contigs (>= 1000 bp)     | 4806                     | 3560                     | 2832                     | 1726                     |
| # contigs (>= 5000 bp)     | 4775                     | 2776                     | 2832                     | 1562                     |
| # contigs (>= 10000 bp)    | 4017                     | 1917                     | 2832                     | 1347                     |
| # contigs (>= 25000 bp)    | 3335                     | 1069                     | 1570                     | 799                      |
| # contigs (>= 50000 bp)    | 2966                     | 734                      | 747                      | 288                      |
| Largest contig             | 15222969                 | 88566048                 | 113921103                | 248986603                |
| <b>Total length</b>        | <b>2778216114</b>        | <b>2836714529</b>        | <b>2904207228</b>        | <b>3088335497</b>        |
| Total length (>= 0 bp)     | 2778216114               | 2837486204               | 2904207228               | 3088495238               |
| Total length (>= 1000 bp)  | 2778216114               | 2837367164               | 2904207228               | 3088485407               |
| Total length (>= 5000 bp)  | 2778073401               | 2834831880               | 2904207228               | 3087990629               |
| Total length (>= 10000 bp) | 2772661904               | 2828723737               | 2904207228               | 3086359078               |
| Total length (>= 25000 bp) | 2761939683               | 2815431970               | 2882817238               | 3076876085               |
| Total length (>= 50000 bp) | 2748699427               | 2803817652               | 2855011855               | 3059626724               |
| <b>N50</b>                 | <b>2012108</b>           | <b>25502944</b>          | <b>44846623</b>          | <b>155338310</b>         |
| N75                        | 937275                   | 8329420                  | 19924750                 | 114367800                |
| L50                        | 369                      | 29                       | 21                       | 8                        |
| L75                        | 875                      | 77                       | 46                       | 14                       |
| GC (%)                     | 40.85                    | 40.81                    | 40.88                    | 40.88                    |
| <b>Misassemblies</b>       |                          |                          |                          |                          |
| # misassemblies            | 3322                     | 1276                     | 1952                     | 1756                     |
| # misassembled contigs     | 777                      | 484                      | 782                      | 374                      |
| Misassembled contigs leng  | 1398700724               | 2137050584               | 2657569650               | 3053643982               |
| # local misassemblies      | 10110                    | 10797                    | 5004                     | 5679                     |
| # scaffold gap ext. mis.   | 0                        | 0                        | 15                       | 3                        |
| # scaffold gap loc. mis.   | 0                        | 0                        | 108                      | 435                      |
| # possible TEs             | 250                      | 330                      | 256                      | 296                      |
| # unaligned mis. contigs   | 33                       | 333                      | 455                      | 228                      |
| <b>Unaligned</b>           |                          |                          |                          |                          |
| # fully unaligned contigs  | 128 + 2501 part          | 1207                     | 402                      | 412                      |
| Fully unaligned length     | 27948040                 | 12541896                 | 9234968                  | 10329457                 |
| <b>Genome fraction (%)</b> | <b>93.235</b>            | <b>94.174</b>            | <b>95.177</b>            | <b>95.391</b>            |
| Duplication ratio          | 1.001                    | 1.01                     | 1.023                    | 1.088                    |
| <b># genomic features</b>  | <b>14996 + 5837 part</b> | <b>17682 + 3226 part</b> | <b>19651 + 1396 part</b> | <b>19356 + 1721 part</b> |
| Largest alignment          | 9191143                  | 75492126                 | 58219133                 | 65512502                 |
| Total aligned length       | 2749835393               | 2800100449               | 2829006639               | 2832740986               |
| NG50                       | 1734895                  | 20857787                 | 39609866                 | 145208384                |
| NG75                       | 610541                   | 5007910                  | 14897232                 | 114367800                |
| NA50                       | 1339017                  | 12942852                 | 15098581                 | 19529238                 |
| NA75                       | 659297                   | 5094247                  | 5183319                  | 9114594                  |
| NGA50                      | 1175915                  | 11187777                 | 13028687                 | 19529238                 |
| NGA75                      | 435352                   | 3192669                  | 3932304                  | 8890200                  |
| LG50                       | 455                      | 35                       | 24                       | 9                        |
| LG75                       | 1193                     | 109                      | 54                       | 14                       |
| LA50                       | 584                      | 60                       | 59                       | 43                       |
| LA75                       | 1316                     | 146                      | 140                      | 96                       |
| LGA50                      | 712                      | 71                       | 66                       | 43                       |

639

640 **Table 2:** AGENOME-ZPGRF assembly statistics using Quast

641

642 **Table 3**

643

| Repetitive elements                | Number of elements | Length occupied | Percentage of sequence |
|------------------------------------|--------------------|-----------------|------------------------|
| <b>SINEs:</b>                      | 1592285            | 367249056 bp    | 13.45 %                |
| <b>ALUs</b>                        | 1078242            | 289089690 bp    | 10.58 %                |
| <b>MIRs</b>                        | 506412             | 77200621 bp     | 2.83 %                 |
| <b>LINEs:</b>                      | 924026             | 595272136 bp    | 21.80 %                |
| LINE1                              | 517835             | 482717596 bp    | 17.67 %                |
| LINE2                              | 345948             | 98455152 bp     | 3.60 %                 |
| L3/CR1                             | 45096              | 10230478 bp     | 0.37 %                 |
| <b>LTR elements:</b>               | 485651             | 250839692 bp    | 9.18 %                 |
| ERVL                               | 107081             | 55227511 bp     | 2.02 %                 |
| ERVL-MaLRs                         | 241322             | 104424519 bp    | 3.82 %                 |
| ERV_class I                        | 104268             | 76806564 bp     | 2.81 %                 |
| ERV_class II                       | 6733               | 7378587 bp      | 0.27 %                 |
| <b>DNA elements:</b>               | 419798             | 102266826 bp    | 3.74 %                 |
| hAT-Charlie                        | 214680             | 44096448 bp     | 1.61 %                 |
| TcMar-Tigger                       | 96328              | 35713313 bp     | 1.31 %                 |
| Unclassified:                      | 9436               | 4642192 bp      | 0.17 %                 |
| <b>Total interspersed repeats:</b> |                    | 1320269902 bp   | 48.34 %                |
| <b>Small RNA:</b>                  | 11816              | 1234995 bp      | 0.05 %                 |
| <b>Satellites:</b>                 | 4807               | 10740343 bp     | 0.39 %                 |
| <b>Simple repeats:</b>             | 621517             | 35759325 bp     | 1.31 %                 |
| <b>Low complexity:</b>             | 94569              | 5807986 bp      | 0.21 %                 |

644

645

646 **Table 3:** Repetitive elements in AGENOME-ZPGRF identified using REPEATMASKER

647

648

649

650 **Table 4**

651

| AGENOME-ZPGRF Total Variants |             |               | AGENOME- ZPGRFPersonal Variants |               |
|------------------------------|-------------|---------------|---------------------------------|---------------|
| Chromosome                   | Length (bp) | Variant Count | Chromosome                      | Variant Count |
| Chr1                         | 248956422   | 406844        | Chr1                            | 80130         |
| Chr2                         | 242193529   | 405925        | Chr2                            | 55166         |
| Chr3                         | 198295559   | 330471        | Chr3                            | 44518         |
| Chr4                         | 190214555   | 356369        | Chr4                            | 39089         |
| Chr5                         | 181538259   | 300512        | Chr5                            | 40208         |
| Chr6                         | 170805979   | 310307        | Chr6                            | 37739         |
| Chr7                         | 159345973   | 288693        | Chr7                            | 45470         |
| Chr8                         | 145138636   | 248099        | Chr8                            | 28697         |
| Chr9                         | 138394717   | 229576        | Chr9                            | 42833         |
| Chr10                        | 133797422   | 260117        | Chr10                           | 41812         |
| Chr11                        | 135086622   | 244294        | Chr11                           | 32123         |
| Chr12                        | 133275309   | 245744        | Chr12                           | 34417         |
| Chr13                        | 114364328   | 203749        | Chr13                           | 38176         |
| Chr14                        | 107043718   | 161817        | Chr14                           | 25147         |
| Chr15                        | 101991189   | 148767        | Chr15                           | 22335         |
| Chr16                        | 90338345    | 153943        | Chr16                           | 23462         |
| Chr17                        | 83257441    | 148518        | Chr17                           | 33152         |
| Chr18                        | 80373285    | 146714        | Chr18                           | 21699         |
| Chr19                        | 58617616    | 111838        | Chr19                           | 19212         |
| Chr20                        | 64444167    | 136692        | Chr20                           | 45802         |
| Chr21                        | 46709983    | 93091         | Chr21                           | 21527         |
| Chr22                        | 50818468    | 93011         | Chr22                           | 34511         |
| ChrX                         | 156040895   | 172036        | ChrX                            | 42009         |

652

653

654 **Table 4:** Chromosome-wise distribution of variants in AGENOME-ZPGRF and novel variants  
655 in AGENOME-ZPGRF

656

657

658

659

660

661

662 **Table 5**

663

| Type (alphabetical order)                    | Count  | Percent (%) |
|----------------------------------------------|--------|-------------|
| DOWNSTREAM                                   | 61074  | 7.176438102 |
| EXON                                         | 4202   | 0.493751726 |
| INTERGENIC                                   | 433381 | 50.92399255 |
| INTRON                                       | 266354 | 31.29765521 |
| SPLICE_SITE_ACCEPTOR                         | 70     | 0.008225279 |
| SPLICE_SITE_DONOR                            | 51     | 0.005992703 |
| UPSTREAM                                     | 78750  | 9.25343846  |
| UTR_3_PRIME                                  | 5392   | 0.633581463 |
| UTR_5_PRIME                                  | 1761   | 0.20692451  |
| TOTAL                                        | 851035 |             |
| <b>Number of effects by impact</b>           |        |             |
| Type (alphabetical order)                    | Count  | Percent     |
| HIGH                                         | 415    | 0.043318195 |
| LOW                                          | 1702   | 0.177656788 |
| MODERATE                                     | 2150   | 0.224419562 |
| MODIFIER                                     | 953760 | 99.55460545 |
| TOTAL                                        | 958027 |             |
| <b>Number of effects by functional class</b> |        |             |
| Type (alphabetical order)                    | Count  | Percent     |
| MISSENSE                                     | 2009   | 56.83168317 |
| NONSENSE                                     | 31     | 0.876944837 |
| SILENT                                       | 1495   | 42.29137199 |
| TOTAL                                        | 3535   |             |

664

665

666 **Table 5:** Genomic location, functional class and impact of unique variants in AGENOME-

667 ZPGRF

668

669

670

671

672

673

674

675

## Supplementary Figures

676

### 677 **Supplementary Figure 1**

678

#### 679 **Fastqc for cleaned 100 x female short reads -R1**

680 Total Sequences 1255218629

681 Average coverage 62.76093145

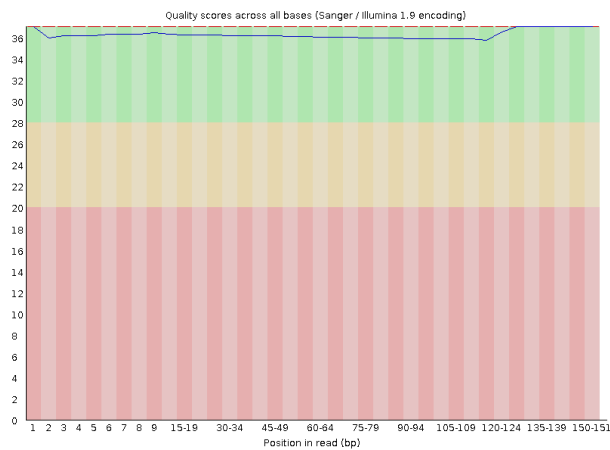

682

#### 683 **Fastqc for cleaned 30 x female short reads**

684 Total Sequences 450173738

685 Average coverage 22.5086869

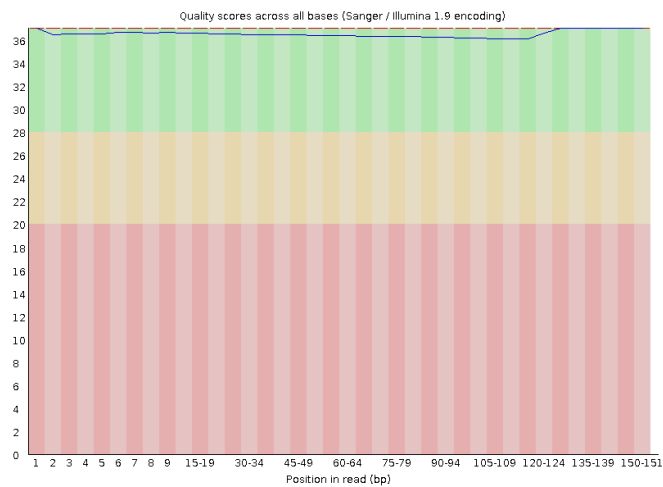

686

687 **Supplementary Figure 1: Representative read quality plot from FastQC after cleaning of reads**  
688 **using AdapterRemoval**

689

690 **Supplementary Figure 2:**

691 **A)**

| Trimming and Filtering |              |                      |
|------------------------|--------------|----------------------|
|                        | Raw          | Trimmed and Filtered |
| No. of Reads (Raw)     | 16.76 M      | 16.03 M              |
| Total Base Pairs (Raw) | 1.81 G       | 1.72 G               |
| Mean Length (bp)       | 108bp; 108bp | 107bp; 107bp         |
| Q20 bases (%)          | 94.37        | 96.36                |
| Q30 bases (%)          | 91.98        | 94.18                |
| GC content (%)         | 47.06        | 46.79                |

692

693 **B)**

694 **Before filter**

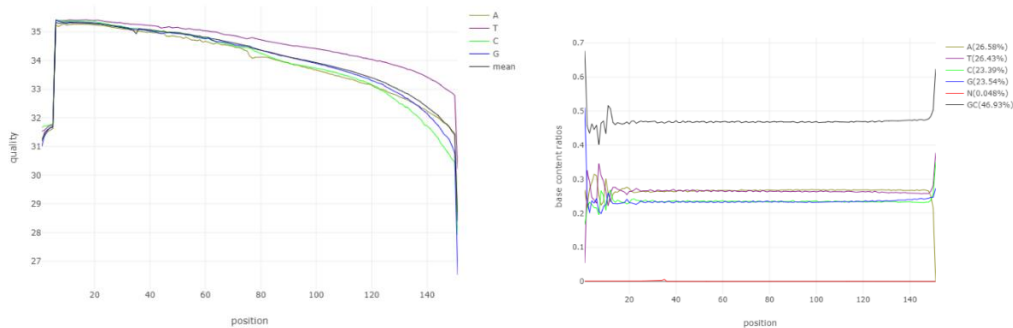

695

696 **After filter**

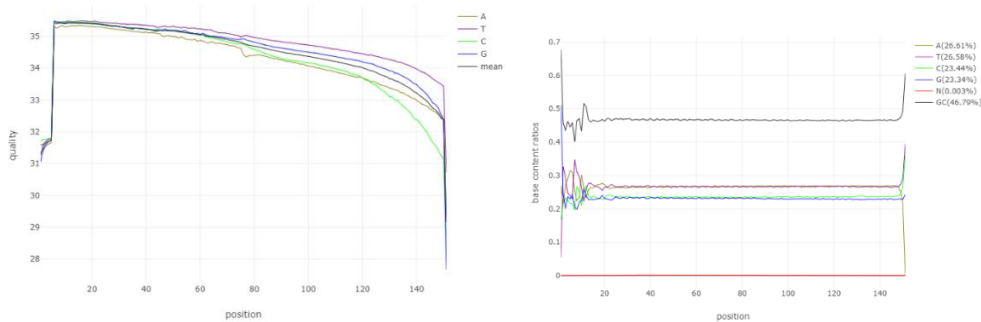

697

698 **Supplementary Figure 2: Read sequencing and Analysis statistics. A) Table indicating read**  
 699 **processing and QC of sequencing data pre and post filtering B) Fastp output of read quality and**  
 700 **base counts**

701

702

703 **Supplementary Figure 3:**

704

| Type (alphabetical order)                    | Count          | Percent (%) |
|----------------------------------------------|----------------|-------------|
| <b>DOWNS'TREAM</b>                           | 371789         | 7.196359982 |
| <b>EXON</b>                                  | 27640          | 0.535000739 |
| <b>INTERGENIC</b>                            | 2106964        | 40.78246374 |
| <b>INTRON</b>                                | 2139107        | 41.4046247  |
| <b>SPLICE_SITE_ACCEPTOR</b>                  | 281            | 0.005439045 |
| <b>SPLICE_SITE_DONOR</b>                     | 301            | 0.005826166 |
| <b>UPSTREAM</b>                              | 456935         | 8.844448729 |
| <b>UTR_3_PRIME</b>                           | 47060          | 0.910894891 |
| <b>UTR_5_PRIME</b>                           | 16271          | 0.314942005 |
| <b>TOTAL</b>                                 | <b>5166348</b> | <b>100</b>  |
| <b>Number of effects by impact</b>           |                |             |
| Type (alphabetical order)                    | Count          | Percent     |
| <b>HIGH</b>                                  | 1652           | 0.031058581 |
| <b>LOW</b>                                   | 16128          | 0.303215973 |
| <b>MODERATE</b>                              | 14856          | 0.279301618 |
| <b>MODIFIER</b>                              | 5286345        | 99.38642383 |
| <b>TOTAL</b>                                 | <b>5318981</b> | <b>100</b>  |
| <b>Number of effects by functional class</b> |                |             |
| Type (alphabetical order)                    | Count          | Percent     |
| <b>MISSENSE</b>                              | 14572          | 51.89089096 |
| <b>NONSENSE</b>                              | 189            | 0.673028987 |
| <b>SILENT</b>                                | 13321          | 47.43608005 |
| <b>TOTAL</b>                                 | <b>28082</b>   | <b>100</b>  |

705

706 **Supplementary Figure 3: AGENOME-ZPGRF genome wide distribution of variants across**  
 707 **different genomic regions, by impact and functional classes**

708

709

710

711

712

713

714

715

716
